# Supplementary material for: Determination of aristolochic acids in rat serum by high performance liquid chromatography-Q-TOF tandem mass spectrometry
Source: Royal Society of Chemistry journal article supplement (doi:10.1039/c2ay25860a), 2012-11-12
Supplement: c2ay25860a.pdf [file c2ay25860a.pdf]

## Electronic Supplementary Information

### Determination **of** aristolochic acids in rat serum by high performance liquid chromatography-Q TOF tandem mass spectrometry

Jiangping Gu<sup>a</sup>, Pinjie Zhang<sup>a</sup>, Feifang Zhang<sup>a\*</sup>, HeQing Shen<sup>b</sup>, Bingcheng Yang<sup>a\*</sup>,

Xinmiao Liang<sup>a</sup>, Xiaogang Chu<sup>c</sup>

<sup>a</sup>School of Pharmacy, East China University of Science and Technology, Shanghai, 200237, China

<sup>b</sup>Institute of Urban Environment, Chinese Academy of Sciences, Xiamen, 361021, China

<sup>c</sup>Institute of Food Safety, Chinese Academy of Inspection and Quarantine, Beijing 100123, China

**Correspondence:** Dr. Feifang Zhang, School of Pharmacy, East China University of Science and Technology, Shanghai 200237, China

**Email:** [zhangff@ecust.edu.cn](mailto:zhangff@ecust.edu.cn)

**Tel/Fax:** 0086-21-64250627

SI- Table 1. MS operation conditions for four AAs and IS (Naproxen)

| Parent ion (m/z) | Daughter ion (m/z) | Scan time (msec) | Analyte | Declustering potential (DP) | Entrance potential (EP) | Collision energy (CEP) | Collision energy (CE) | Collision Cell Exit Potential (CXP) |
|------------------|--------------------|------------------|---------|-----------------------------|-------------------------|------------------------|-----------------------|-------------------------------------|
| 340              | 46                 | 50               | AAI     | -25                         | -2                      | -18                    | -16                   | -4                                  |
| 310              | 46                 | 50               | AAII    | -25                         | -1                      | -26                    | -14                   | -4                                  |
| 326              | 236                | 50               | AAIIIa  | -40                         | -4                      | -18                    | -26                   | -2                                  |
| 356              | 266                | 50               | AAIVa   | -40                         | -305                    | -20                    | -30                   | -2                                  |
| 229              | 73                 | 50               | IS      | -20                         | -6                      | -22                    | -42                   | -2                                  |
